# Supplementary material for: A small molecule that disrupts S. Typhimurium membrane voltage without cell lysis reduces bacterial colonization of mice
Source: PubMed Central journal article supplement (PMC9223311; doi:10.1371/journal.ppat.1010606), 2022-06-10
Supplement: ppat.1010606.s001.pdf [file ppat.1010606.s001.pdf]

**Figure A in S1 Figure**

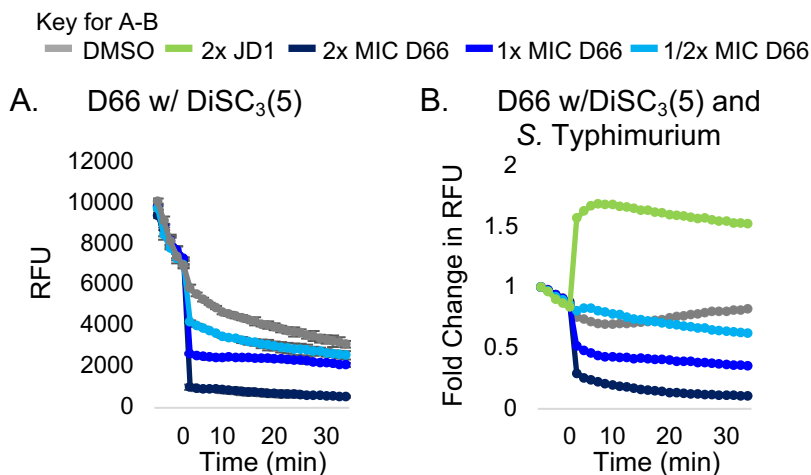

**Figure S1. D66 quenches the fluorescent dye DiSC<sub>3</sub>(5) in a concentration-dependent manner.** A) Control wells (without bacterial cells) containing medium with 2 mM DiSC<sub>3</sub>(5) and DMSO or compound, as indicated, added at time 0. B) Data from Fig 3A normalized to DMSO at time 0 but without correction for the quenching effect of D66 observed in panel A. JD1 was included as a control.

**Figure B in S1 Figure**

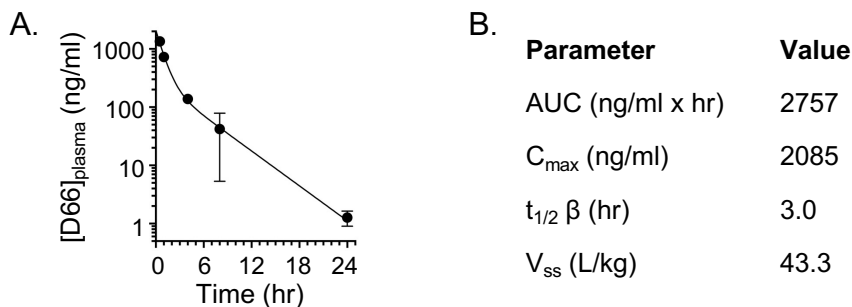

**Figure S2. D66 pharmacokinetic parameters.** Values were calculated by compartmental modeling using Phoenix WinNonlin. Data fit a two-compartment model ( $r = 0.9976$ ) with bolus dosing. A) Decay curve. B) Parameter values.
